# Supplementary material for: Evidence of the Storegga Tsunami 8200 BP? An Archaeological Review of Impact After a Large-Scale Marine Event in Mesolithic Northern Europe
Source: Frontiers journal article supplement (doi:10.3389/feart.2021.767460), 2021-12-07
Supplement: Table_1.xlsx [file Table_1.xlsx]

## Sheet: 1A_NE UK
Table 1A and B (supplementary material): List of Mesolithic sites plotted in Figure 3 and mentioned in text. The table is divided between sheet 1A) Northeastern UK, and sheet 1B) West and Central Norwegian sites. The sites and dates included in these tables and discussed in the text are not comprehensive, but were included as illustrative of the variation in character of the archaeological record…
Region	Site no.	Site name	cal BC	uncal BP	Lab.-Reference	References
Scotland	48	West Voe	7030–6630	7881±38	OxA-14147	Edwards, K.J., J.E. Schofield, G. Whittington & N.D. Melton. 2009. Palynology 'On The Edge' and the Archaeological Vindication of a Mesolithic Presence? The case of Shetland. In N. Finlay, S. McCartan, N. Milner & C. Wickham-Jones (ed.) From Bann Flakes to Bushmills: 113-123. Oxford: Oxbow Books.
	49	Longhowe	7030-6640	7900±35	SUERC-15587	Wickham-Jones, C. and J. Downes. 2007. Long Howe, Orkney: excavation. Discovery and Excavation in Scotland 8: 147.
	50	Tarradale	6210–6000; 6630–6480	7202±29; 7729±29	SUERC-46140; SUERC-46141	Peteranna, M. and S. Birch. 2017. Tarradale Through Time 2017 Mesolithic Shell Middens at Tarradale, Muir of Ord Archaeological Evaluation and Test Pitting Data Structure Report. AOC Archaeological Group.
	52	Castle Street	6100-5740	7080±85	GU-1377	Wordsworth, J. 1985. The excavation of a Mesolithic horizon at 13-24 Castle Street, Inverness. Proceedings of the Society of Antiquaries of Scotland, 115, 89-103.
	53	Lesmurdie Rd	7520-7180; 7540-7200; 6230-6030; 6210-5980	8320±50; 8350±50; 7260±50; 7190±50	Poz-5492; Poz-5490; Poz-5489; Poz-5488	Suddaby, I. 2007. Downsizing in the Mesolithic? The discovery of two associated post-circles at Silvercrest, Lesmurdie Road, Elgin, Scotland. In C. Waddington & K.L.R. Pedersen (ed.) Mesolithic Studies in the North Sea Basin and Beyond, Proceedings of a Conference Held at Newcastle in 2003: 60-68. Oxbow Books, Oxford.
	54	Warren Fields	5760–5520; 5630–5500; 7290–6840; 7180–6830; 7090–6810; 7090–6810; 7040–6690; 7590–7480	6740±70; 6635±35; 8100±40; 8080±35; 8040±40; 8040±40; 7945±40; 8460±40	SUERC-12251; SUERC-12258; SUERC-12257; SUERC-12262; SUERC-12259; SUERC-12260; SUERC-12256; SUERC-10082	Marshall, P. 2009. The Radiocarbon dating of the pit alignment and the timber hall. In H.K. Murray, J.C. Murray, S.M. Fraser (ed.) A Tale of the Unknown Unknowns. A Mesolithic Pit Alignment and a Neolithic Timber Hall at Warren Field, Crathes, Aberdeenshire, Oxford: Oxbow Books
	55	Garthdee	5670-5540; 5620-5490	6690±35; 6620±35	SUERC-8614; SUERC-8615	Murray, H.K. and J.C. Murray. 2014. Mesolithic and Early Neolithic activity along the Dee: excavations at Garthdee Road, Aberdeen. Proceedings of the Society of Antiquaries of Scotland, 144: 1-64.
	56-57	Chest of Dee	6654–6511; 7100–6820; 7090–6750; 7100–6750; 7100–6750; 7090–6740; 7090–6920; 7080–6730; 7080–6700; 7080–6690; 7080–6690; 7060–6680; 6660–6510; 6260–6070; 6120–5970; 5570–5420	7697 ± 37; 7990 ± 28; 7958 ± 27; 7974 ± 35; 7961 ± 35; 7945 ± 35; 7941 ± 35; 7930 ± 28; 7912 ± 35; 7904 ± 35; 7885 ± 35; 7879 ± 35; 7705 ± 35; 7225 ± 28; 7134 ± 29; 6492 ± 28	SUERC-64468; SUERC-58527; SUERC-65011; SUERC-65015; SUERC-65016; SUERC-65013; SUERC-65017; SUERC-58526; SUERC-65012; SUERC-65005; SUERC-65006; SUERC-65014; SUERC-65007; SUERC-58520; SUERC-59012; SUERC-74122	Wickham-Jones, C.R., G. Noble, S.M. Fraser, G. Warren, R. Tipping, D. Paterson, W. Mitchell, D. Hamilton and A. Clarke. 2020. New Evidence for Upland Occupation in the Mesolithic of Scotland. Proceedings of the Prehistoric Society 86: 13-42.
	59	Edramucky Burn	7170-6760	8045±55	OxA-8967	Atkinson, J.A. 2016. Ben Lawers: An archaeological landscape in time. Scottish Archaeological Internet Reports 62.
	60	Chapelfield	5730-5500; 5720-5520	6710±70; 6705±70	GU-7201; AA26226	Atkinson, J.A. 1997. Chapelfield, Cowie. Discovery & Excavation in Scotland 1997: 116.
	61	Castlandhill	6830-6600	7860±35	SUERC-39750	Robertson, A., Lochrie, J., Timpany, S., Bailey, L., Mynett, A., Shillito, L.-M., & Smith, C. (2014). Built to last: Mesolithic and Neolithic settlement at two sites beside the Forth estuary, Scotland. Proceedings of the Society of Antiquaries of Scotland, 143, 73-136. Retrieved from http://journals.socantscot.org/index.php/psas/article/view/9800
	62	Fallago Rig	6230-6080; 6430-6250	7306±30; 7480±30	SUERC-54190	Carruthers, G. & C. Hills. 2014. Fallago Rig Wind Farm Scottish Borders. Post-Excavation Archive Report No. 3182. CFA Archaeology Ltd (2014).
N.E. England	63	Howick	7530–7330; 7530–7190; 7520–7200; 7500–7190; 7470–7180; 7460–7180; 7450–7080	8355±39; 8330±45; 8324±37; 8310±40; 8280±40; 8278±35; 8233±36	OxA-12323; OxA-12408; OxA-11805; OxA-12322; OxA-12293; OxA-11806; OxA-11807	A. Bayliss, I. Boomer, C. Bronk Ramsey, D. Hamilton, C. Waddington. 2007. Absolute dating. In C. Waddington (ed.) Mesolithic Settlement in the North Sea Basin. A Case Study from Howick, North-East England: 65-74. Oxford: Oxbow Books.
	64	Low Hauxley	7330–7080; 7580–7380; 7570–7380; 7550–7350; 7520–7340; 7520–7340; 7490–7190	8207±32; 8419±32; 8418±32; 8402±32; 8351±32; 8350±32; 8306±32	SUERC-49879; SUERC-49877; SUERC-49881; SUERC-49887; SUERC-49888; SUERC-49882; SUERC-49880	Waddington, C. and C. Bonsall 2016. Archaeology and Environment on the North Sea Littoral: A Case Study from Low Hauxley. Bakewell: Archaeological Research Services Ltd.
S. North Sea	65	Yangtze Harbour	7022-6595; 7047-6699; 6812-6508	7860±45; 7970±45; 7820±45	GrA-55484; GrA-55483; GrA-55482	Kubiak-Martens, L., F. Verbruggen and L.I. Kooistra. 2015. Archaeobotany: landscape reconstruction and plant food subsistence economy on a meso and microscale. In J.J. Moree and M.M. Sier (ed.) Twenty metres deep! The Mesolithic period at the Yangtze Harbour site - Rotterdam Maasvlakte, the Netherlands. Early Holocene landscape development and habitation. Port of Rotterdam Authority: BOORapporten…
Caption reference: Kubiak-Martens, L., et al. (2015). "Archaeobotany: landscape reconstruction and plant food subsistence economy on a meso and microscale." In Twenty metres deep! The Mesolithic period at the Yangtze Harbour site - Rotterdam Maasvlakte, the Netherlands. Early Holocene landscape development and habitation, edited by J. J. Moree and M. M. Sier. Rotterdam: Port of Rotterdam Authorit…

## Sheet: 1B_ West and Central Norway
Table 1A and B (supplementary material): List of Mesolithic sites plotted in Figure 3 and mentioned in text. The table is divided between sheet 1A) Northeastern UK, and sheet 1B) West and Central Norwegian sites. The sites and dates included in these tables and discussed in the text are not comprehensive, but were included as illustrative of the variation in character of the archaeological record…
Region	Site no.	Site name	cal BC	uncal BP	Lab.ref.	Reference
Central Norway (coast)	1	Fillan trafo, Hitra, Trøndelag	5747-5671; 5749-5667; 5754-5657; 5737-5662; 5736-5662; 5720-5637; 5721-5634; 5661-5565 BC	6842±18; 6839±20; 6829±27; 6819 ±22; 6817±21; 6778±24; 6765±19; 6703±20	Tra-12936; TRa-12941; Tra-12933; Tra-12942; Tra-12937; Tra-12938; Tra-12940; Tra-12939	Oftedal, K.Ø and Henriksen, M.M (2019). Arkeologiske undersøkelser av steinalderlokalitet ved Fillan Trafo (Valen) 2017, Hitra, Trøndelag. NTNU Vitenskapsmuseet arkeologiske rapporter 2019-6
	2	Kalveheiane 2, Aure, Trøndelag	6675-6490; 7150-6990 BC	7810±85 BP; 8095±95	T-11379	Solem 2001, in Berglund, B. e. (2001). "Gassprosjektet" - Arkeologiske undersøkelser på Tjelbergodden, Aure kommune, Møre og Romsdal fylke i forbindelse med bygging av metanolanlegg. Trondheim: Norges teknisk-naturvitenskapelige universitet Vitenskapsmuseet.
	3	Kalveheiane 3, Aure, Trøndelag	6610-6465; 5740-5600; 5595-5445; 4540-4340 BC	7765±70 BP; 6845±85; 6650±85; 5595±130 BP	TUa-1163; TUa-883; TUa-882; T-11875	Berglund, B. e. (2001). "Gassprosjektet" - Arkeologiske undersøkelser på Tjelbergodden, Aure kommune, Møre og Romsdal fylke i forbindelse med bygging av metanolanlegg. Trondheim: Norges teknisk-naturvitenskapelige universitet Vitenskapsmuseet.
	4	Myrset, Aure, Trøndelag	6455-6380 BC	7595±55 BP	Tua-3518	Auset, H. (2002) Arkeologisk rapport. Riksveg 680 Foldfjorden, Aure kommune, Møre og Romsdal Fylke, G.nr. 91/13 Myrset av Straumsvik, T-22664
	5	Leira (lower level/cultural layer), Aure, Trøndelag	not calibrated by lab	8305±70; 8235±105; 8215±70; 8205±100; 8055±85; 8055±110; 7615±70; 7340±70; 7045±100; 6900±80; 6475±80 BP	Ua-3495; Ua-3486; Ua-3490; Ua-3487; Ua-3492; Ua-3491; Ua-3493; Ua-3488; Ua-3485; Ua-3489; Ua-3493;	Johansen, K. (1993). Rapport. Utgravninger av "Leira" 16/5, Tustna kommune, Møre og Romsdal. 18/5-26/2-1992; Leiren Johansen, K., and P. U. Sandvik (1995). "Havet og landet før Riksvei 68." Spor 10: (1):16-19.
	6	Meisingset, lok 1, phase 1 and 2, Tingvoll, Møre og Romsdal	7137-6830; 7029-6648; 7023-6648; 7026-6645; 7001-6645; 7000-6607; 6806-6633; 6654-6498; 6591- 6458; 6491-6415; 6396- 6235; 6361-6219; 6356-6092; 6330-6080; 6247-6077; 5843-5673; 5841-5678; 5838-5643; BC	8060±35; 7910±50; 7900±35; 7895±; 7890±30; 7870±35; 7860±30; 7765±35; 7670±30; 7600±30; 744±35; 7385±20; 7360±30; 7340±30; 7325±35; 6875±40; 6845±50 BP	Tra- 11085; Tra-11084; Tra-11082; Tra-11081; Tra-11077; Tra-11087; Tra-11083; Tra-11073; Tra-11080; Tra-11074; Tra-11254; Tra-11075; Tra-11072; Tra-11078; Tra-11076; Tra-11070; Tra-11071 ; Tra-11079	Mykkelbost, M. og Henriksen M.M. 2017. Arkeologisk utgravning av steinalderlokaliteter, NTNU Vitenskapsmuseet, Arkeologisk rapport 2017/6, Meisingset, Tingvoll, Møre og Romsdal.
	7	Meisingset, lok 2, Tingvoll, Møre og Romsdal	5215-5041; 5208- 4999 BC	6170±25; 6135±30 BP	Tra-11067; Tra-11068	Mykkelbost, M. og Henriksen M.M. 2017. Arkeologisk utgravning av steinalderlokaliteter, NTNU Vitenskapsmuseet, Arkeologisk rapport 2017/6, Meisingset, Tingvoll, Møre og Romsdal.
	8	Hestvikholmane Lok 11 (ID92335), oldest phase, Averøy, Møre og Romsdal	6110-5890; 6070-5890; 6010-5790; 5480-5290 BC	7143±56 BP; 7103±47; 7021±46; 6384±48 BP	Ua-45486; Ua-45489; Ua-45487; Ua-45488	Sjøbakk 2013; Rapport. Arkeologiske undersøkelser i forbindelse med regulering av Hestvikholmane industriområde, Averøya, Møre og Romsdal. Lokalitet 11. T-25847, NTNU, Vitenskapsmuseet, Seksjon for arkeologi og kulturhistorie
	9	Henda lok. 1, Averøy, Møre og Romsdal	6450-6170; 6410-170; 6370-6170; 6355-6030; 6215-6025; 5625-5585; 5575-5475 BC	7495±145; 7465±120; 7425±90; 7355±120; 7325±90; 6735±50; 6630±40 BP	T-18847; T-18848; T-18845; T-19946; T-18844; Tua-6433; Tua-6434	Breivik, H. M. 2008; Rapport. Arkeologiske undersøkelser, FV 251 Skaret – Langøybroa. Henda gnr. 78, Averøy, Møre og Romsdal. T 23420. NTNU Vitenskapsmuseet, Seksjon for Arkeologi og Kulturhistorie
	10	Lok.29 Nyhamna, Aukra, Møre og Romsdal	5970-5860; 6175-6015; 6210-6045; 6365-6185; 6400-6240; 6455-6375; 6465-6410; 6550-6370; 6475-6415 BC	7080±50;7285±55; 7335±80; 7445±55; 7515±50; 7580±55; 7630±55; 7640±125; 7655±60 BP	Tua-4753; Tua-4750; T-16601; Tua-4755; Tua-4756; Tua-4759; Tua-4758; T-16562; Tua-4754;	Bjerck, H. B., et al. (2008). NTNU Vitenskapsmuseets arkeologiske undersøkelser Ormen Lange Nyhamna. Edited by H. B. Bjerck. Trondheim: Tapir.
	11	Lok.30 Nyhamna, Aukra, Møre og Romsdal	5805-5695; 5820-5715; 5980-5845; 6170-5960; 6375-6220; 6380-6220 BC	6920±55; 6945±45; 7080±70; 7215±110; 7480±45; 7485±45 BP	Tua-5893; Tua-5326; Tua-5325; T-17506; Tua-5572; Tua-5571;	Bjerck, H. B., et al. (2008). NTNU Vitenskapsmuseets arkeologiske undersøkelser Ormen Lange Nyhamna. Edited by H. B. Bjerck. Trondheim: Tapir.
	12	Lok.50 Nyhamna, Aukra, Møre og Romsdal	5960-5640; 6230-6175; 5930-5760; 5955-5840; 5970-5860; 6015-5965; 6190-5990 BC	6955±150; 7405±45; 6990±40; 7050±45; 7080±50; 7175±45; 7285±105 BP	T-17339; Tua-4949; Tua-4948; Tua-4951; Tua-4951; Tua-4954; T-17356	Bjerck, H. B., et al. (2008). NTNU Vitenskapsmuseets arkeologiske undersøkelser Ormen Lange Nyhamna. Edited by H. B. Bjerck. Trondheim: Tapir.
	13	Lok.62 Grunnvika, Aukra, Møre og Romsdal	6340-6070; 6990-6640; 6175-5995 BC	7335±80; 7815±140; 7270±70 BP	Tua-3692; Tua-16849; T-16848	Bjerck, H. B., et al. (2008). NTNU Vitenskapsmuseets arkeologiske undersøkelser Ormen Lange Nyhamna. Edited by H. B. Bjerck. Trondheim: Tapir.
West Norway (coast)	14	Lok.1 Sætergården, Haram, Møre og Romsdal	not given	6970±70; 7060±80 BP	Beta-112633, Beta-112634	Simpson, D. (1998). Innberetning: Arkeologiske undersøkelser på Lok. 1 Sætergarden (B15661), Tennfjord, Haram k., Møre og Romsdal. Unpublished archival report: Department of Archaeology, Bergen Museum, University of Bergen.
	15	Lok 65, from Layer E and F, Longva, Haram, Møre og Romsdal	not given	7010±30; 6880±30; 6870±40; 6740±30; 6740±30; 6730±30; 6680±30; 6650±30; 6630±30; 6570±30; 6570±30; 6570±30; 6560±30; 6550±30; 6530±30	Beta-428844; Beta-458886; Beta-428845; Beta-458885; Beta-468569; Beta-428840; Beta-389722; Beta-468570; Beta-468571; Beta-415029; Beta-389716; Beta-468568; Beta-389714; Beta-415035; Beta-468572;	Bondevik, S., et al. (2019). "Between winter storm surges - Human occupation on a growing Mid-Holocene transgression maximum (Tapes) beach ridge at Longva, Western Norway." Quaternary Science Reviews 215:116-131.
	16	Dysjvika, Fjørtoft, Møre og Romsdal	7100-6500; 7200-6600; 6500-5300 BC	7990±210; 7890±210; 7550±90 BP	T-1477; T-1619; not given	Indrelid, S. (1973) En mesolittisk boplass i Dysvikja på Fjørtoft. Arkeo, 7-11. Indrelid S. (1974) C14-datering av boplassen i Dysvikja på Fjørtoft. Arkeo, 10. Braathen, H. (1985). Sunde 34. Deskriptiv analyse av en sørvestnorsk boplass fra Atlantisk tid, AmS-Varia 14. Stavanger: Arkeologisk museum
	17	Lok. 17, Havnen, phase 1/ flet 1, Skatestraumen, Sogn og Fjordane	5964-5835 BC	7080±60 BP	Beta-67998/CAMS-10243	Bergsvik, K. A. (2002). Arkeologiske undersøkelser ved Skatestraumen. Bind I. Bergen: Museum of Bergen, University of Bergen.
	18	Lok. 19 Havnen, Skatestraumen, Sogn og Fjordane	6200-6010; 5825-5710; 5615-5495 BC	7230±80; 6890±70; 6610±50 BP	Beta-131213; Beta-131212; Beta-131211	Bergsvik, K. A. (2002). Arkeologiske undersøkelser ved Skatestraumen. Bind I. Bergen: Museum of Bergen, University of Bergen.
	19	Lok. 154 Havnen, Skatestraumen, Sogn og Fjordane	6470-6420; 5610-5465 BC	7610±60; 6560±90 BP	Beta-131216; Beta-131215	Bergsvik, K. A. (2002). Arkeologiske undersøkelser ved Skatestraumen. Bind I. Bergen: Museum of Bergen, University of Bergen.
	20	Lok.30 Nygård Phase 1, Skatestraumen, Sogn og Fjordane	6485-6380; 6580-6430 BC	7630±100; 7710±90	Beta-88515; Beta-88516	Bergsvik, K. A. (2002). Arkeologiske undersøkelser ved Skatestraumen. Bind I. Bergen: Museum of Bergen, University of Bergen.
	21	Lok. 6 Haukedal Phase 1, Skatestraumen, Sogn og Fjordane	6130-5810 BC	7140±180 BP	Beta-48243	Bergsvik, K. A. (2002). Arkeologiske undersøkelser ved Skatestraumen. Bind I. Bergen: Museum of Bergen, University of Bergen.
	22	Botnaneset VIII/1& 2, Flora, Sogn og Fjordane	not given	7060±60; 6770±130; 6720±120; 6510±120; 6530±60; 5970±100 BP	T4478; T4480; T4485; T4479; T4486; T4481	Bjerck, L. B., & Olsen, A. B. (1983). Kulturhistoriske undersøkelser på Botnaneset, Flora 1981-82. Fangstbosetning og tidlig jordbruk i steinalder/ bronsealder. Bergen: Historisk museum, UiB.
	23	Kotedalen phase 2, Straume, Hordaland	6560-6400; 6430-6130 ; 6370-6080; 6170-5980	7610±90 BP; 7440±110; 7330±110; 7230±100	T-7529; T-7528; T-6232; T-7526;	Olsen, A. B. (1992). Kotedalen - en boplass gjennom 5000 år. Fangstbosetning og tidlig jordbruk i Vestnorsk steinalder: Nye funn og nye perspektiver (Vol. Bind I). Bergen: Museum of History, University of Bergen.
	24	Kotedalen phase 3, Straume, Hordaland	6080-5970; 6430-6170; 6230-6080; 6080-5800 BC	7150±70; 7450±100; 7330±90; 7080±130 uncal BP	T-7049; T-7332; T-7333; T-7527	Olsen, A. B. (1992). Kotedalen - en boplass gjennom 5000 år. Fangstbosetning og tidlig jordbruk i Vestnorsk steinalder: Nye funn og nye perspektiver (Vol. Bind I). Bergen: Museum of History, University of Bergen.
	25	Kotedalen phase 4, Straume, Hordaland	5740-5580; 6130-5980; 6090-5890 BC	6800±90; 7220±100; 7140±90 BP	T-7153; T-7514; T-7762	Olsen, A. B. (1992). Kotedalen - en boplass gjennom 5000 år. Fangstbosetning og tidlig jordbruk i Vestnorsk steinalder: Nye funn og nye perspektiver (Vol. Bind I). Bergen: Museum of History, University of Bergen.
	26	Kotedalen phase 5, Straume, Hordaland	5970-5650; 5990-5740; 5960-5650; 5960-5660 BC	6950±130; 7020±110; 6920±90; 6930±90 BP	T-6231; T-7050; T-7334; T-7515	Olsen, A. B. (1992). Kotedalen - en boplass gjennom 5000 år. Fangstbosetning og tidlig jordbruk i Vestnorsk steinalder: Nye funn og nye perspektiver (Vol. Bind I). Bergen: Museum of History, University of Bergen.
	27	Lok. 6 Revarvika, Kollsnes, Hordaland	6535-6282; 6534-6304 BC	7600±90 BP; 7610±70 BP	Ua-2454; Ua-2455	Nærøy, A. J. (1994). Troll-prosjektet. Arkeologiske undersøkelser på Kollsnes, Øygarden K., Hordaland, 1989-1992. Bergen: Department of Archaeology, University of Bergen.
	28	Lok. 17 Budalen, Kollsnes, Hordaland	6157-6000 BC	7255±65 BP	Beta-44287	Nærøy, A. J. (1994). Troll-prosjektet. Arkeologiske undersøkelser på Kollsnes, Øygarden K., Hordaland, 1989-1992. Bergen: Department of Archaeology, University of Bergen.
	29	lok 111 Djupedalen, Stord, Hordaland	6510-6445 BC	7700±50 BP	Beta-93907	Kristoffersen, K. K., & Warren, E. J. (2001). Kulturminner i Trekant-traséen. De arkeologiske undersøkelsene i forbindelse med utbygging av Trekantsambandet i kommunene Bømlo, Sveio og Stord i Sunnhordland (Vol. 6). Bergen: Department of Archaeology, University of Bergen.
	30	Grunnavåg, Stord, Hordaland	5842-5718 BC	6890±30 BP	Beta-501009	Reidarsdatter and Zinsli (2019); Grunnavåg lokalitet 1 og 3 – ID106367 og 106369. Setravik gbnr. 53/126, Stord k., Hordaland;Arkeologiske undersøkelser av to steinalderboplasser med flere aktivitetsflater fra mellom- og senmesolitikum
	31	Svortland, Bømlo, Hordaland	6430-6260; 7020-6655 BC	7490±30; 7910±30 BP	Beta-412372; Beta-412373	Carrasco, L. and T. E. Linge (2018). Svortland Askeladden id. 139679. Gnr/Bnr 109/561, Bømlo kommune, Hordaland. Mesolittisk verkstedsplass med produksjonsavfall av grønnstein og funn av hakke av grønn skifer. Arkeologiske utgravningsrapporter fra Fornminneseksjonen, Universitetsmuseet i Bergen
	32	Løvegapet, Bømlo, Hordaland	7310-7075; 6200-6020; 6065-5990; 6055-5985; 5895-5740; 6020-5890; 6065-5990; 5980-5810; 5890- 5740; 5895-5740; 5715-5625; 5640-5555; 5610-5480; 5530-5470 BC	8230±30; 7240±30; 7200±30; 7170±30; 7140±30; 7100±40; 7020±30; 6970±30; 6950±30; 6940±30; 6760±30; 6690±30; 6580±30; 6560±30 BP	Beta-398707; Beta-398714; Beta-395494; Beta-398712; Beta-398711; Beta-398715; Beta-398709; Beta-401006; Beta-388544; Beta-398705; Beta-419563; Beta-398717; Beta-398708; Beta-419562	Åstveit, L. I., Carrasco, L., Svendsen, J. I., Mehl, I., & Overland, A. (2016). Arkeologiske undersøkelser ved Tjong-Løvegapet på Søre Bømlo. Gnr 44/Bnr 5, 34, Bømlo kommune, Hordaland
South West Norway (Coast)	33	Breiviksklubben, Fosnaneset, Karmøy, Rogaland	7030-6630 BC	7880±80 BP	Beta-129044	Kutschera og Waraas 2000 i Løken, T. red: Åsgård - Natur- og kulturhistoriske undersøkelser langs en gassrør-trasé i Karmøy og Tysvær, Rogaland, AmS-rapport 14
	34	Botten, Fosnaneset, Karmøy, Rogaland	6830-6650; 6370-6230 BC	7900±40; 7420±50 BP	Beta-197313; Beta-198763	Bruen-Olsen in Skjelstad, G. (2011). Steinalderboplasser for Fosenhalvøya. Arkeologiske og naturvitenskapelige undersøkelser 2004-2007. T-Forbindelsen, Karmøy kommune, Nord-Rogaland. Stavanger: Museum of Archaeology, University of Stavanger.
	35	Helleren lok 2, Fosnaneset, Karmøy, Rogaland	5970-5780 BC	6970±40 BP	Beta-211215	Skjelstad, G. (2011). Steinalderboplasser for Fosenhalvøya. Arkeologiske og naturvitenskapelige undersøkelser 2004-2007. T-Forbindelsen, Karmøy kommune, Nord-Rogaland. Stavanger: Museum of Archaeology, University of Stavanger.
	36	Lindøy lok. 4, Karmøy, Rogaland	5800-5670; 5710-5560 BC	6860±50; 6710±60 BP	Beta-198755; Beta-198766	Tellefsen in Skjelstad, G. (2011). Steinalderboplasser for Fosenhalvøya. Arkeologiske og naturvitenskapelige undersøkelser 2004-2007. T-Forbindelsen, Karmøy kommune, Nord-Rogaland. Stavanger: Museum of Archaeology, University of Stavanger.
	37	Lindøy lok. 1b, Karmøy, Rogaland	7060-6820 BC	8020±50 BP	Beta-237319	Skjelstad, G. (2011). Steinalderboplasser for Fosenhalvøya. Arkeologiske og naturvitenskapelige undersøkelser 2004-2007. T-Forbindelsen, Karmøy kommune, Nord-Rogaland. Stavanger: Museum of Archaeology, University of Stavanger.
	38	Fosnaneset lok. 1b, Karmøy, Rogaland	5710-5615; 5710-5640 BC	6730±50; 6770±40 BP	Beta-197312; Beta-237317	Skjelstad, G. (2011). Steinalderboplasser for Fosenhalvøya. Arkeologiske og naturvitenskapelige undersøkelser 2004-2007. T-Forbindelsen, Karmøy kommune, Nord-Rogaland. Stavanger: Museum of Archaeology, University of Stavanger.
	39	Nedre Kvinnesland, Tysvær, Rogaland	6465-6395; 6650-6510 BC	7570±50; 7780±50 BP	Beta-122522; Beta-119500	Jaksland 2000 i Løken, T. red: Åsgård - Natur- og kulturhistoriske undersøkelser langs en gassrør-trasé i Karmøy og Tysvær, Rogaland, AmS-rapport 14
	40	Fiskåvatnet (rock shelter), Karmøy, Rogaland	7005-6665; 7000-6620; 5970-5870; 6165-6015; 5845-5725; 5620-5530 BC	7960±50; 7930±50; 7090±50; 7275±45; 6960±50; 6730±50 BP	Tua-7642; Tua-7640; Tua-7637; Tua-7643; Tua-7641; Tua-7638	Eilertsen, K. (2009). Skjevtrekantene fra Fiskåvatnet - en preliminær presentasjon av mikrolittmaterialetfra en heller ved Fiskåvatnet, Karmøy kommune, Rogaland. In M. Nitter & E. S. Pedersen (Eds.), Tverrfaglige perspektiver (Vol. AmS-Varia39, pp. 67-74). Stavanger: Arkeologisk museum.
	41	Vistehola layer 1-2, Randaberg, Rogaland	7030-6570; 6810-6460; 6255-6025 BC	7850±120; 7780±130; 7800±?? BP	not given	Indrelid 1978: 175 (Indrelid, S. (1978). Mesolithic economy and settlement patterns in Norway. In P. Mellars (Ed.), The Early Postglacial Settlement of Northern Europe. An Ecological Perspective (pp. 147-176). Pittsburg: University of Pittsburg Press.); Brøgger 1907; Schulting et. al. 2016
	42	Ølberg (Trælen), Sola, Rogaland	6457-6362 BC	7530±30 BP	Beta-481832	Nyland, A. J. and K. S. Eilertsen (2018). Sikringsundersøkelse av utpløyd steinalderboplass (ID.225014) Trælen, Ølberg, gnr. 20, bnr. 9, Sola k., Rogaland. (upublisert rapport), Arkeologisk museum, Universitetet i Stavanger.
	43	Sola sentrum, A3, Sola	6410-6247; 6061-5926; 5720-5631 BC	7460±30; 7130±30; 6770±30 BP	Beta-521749; Beta-506154; Beta-506155	Eilertsen, Redmond, Sæther (in prep). Archaeological excavation report from Mesolithic sites at Sola Sentrum, Sola k. Rogaland. Arkeologisk museum, UiS.
	44	Sunde 34, Stavanger, Rogaland	5850-5640; 5760-5390; 5590-5430 BC	6910±100; 6710±240; 6600±110 BP	T-3536; T-3535; T-3715	Braathen, H. (1985). Sunde 34. Descriptive analyse av en sørvestnorsk boplass fra atlantisk tid. AmS-varia 14. Stavanger: Arkeologisk museum Stavanger. Bang-Andersen, S. (1995). "Mesolithic man and the rising sea spotlighted by three tapes-transgressed sites in SW Norway." In Man & Sea in the Mesolithic Coastal settlement above and below present sea level, edited by A. Fischer, 113-121. Oxford: O…
	45	Lego I, Klepp, Rogaland	6600-6270 BC	7590±120 BP	T-7140	Bang-Andersen, S. (1995). "Mesolithic man and the rising sea spotlighted by three tapes-transgressed sites in SW Norway." In Man & Sea in the Mesolithic Coastal settlement above and below present sea level, edited by A. Fischer, 113-121. Oxford: Oxbow.
	46	Lego II, Klepp, Rogaland	6700-6370 BC	7680±150 BP	T-7139	Bang-Andersen, S. (1995). "Mesolithic man and the rising sea spotlighted by three tapes-transgressed sites in SW Norway." In Man & Sea in the Mesolithic Coastal settlement above and below present sea level, edited by A. Fischer, 113-121. Oxford: Oxbow.
	47	Hå Old Vic, Hå Rogaland	7570-7390; 7260-7290; 7010-6610 BC	8430±170; 8140±90; 7950±90 BP	T-7138; T5972; T-7137	Bang-Andersen, S. (1995). "Mesolithic man and the rising sea spotlighted by three tapes-transgressed sites in SW Norway." In Man & Sea in the Mesolithic Coastal settlement above and below present sea level, edited by A. Fischer, 113-121. Oxford: Oxbow.
Caption reference: Kubiak-Martens, L., et al. (2015). "Archaeobotany: landscape reconstruction and plant food subsistence economy on a meso and microscale." In Twenty metres deep! The Mesolithic period at the Yangtze Harbour site - Rotterdam Maasvlakte, the Netherlands. Early Holocene landscape development and habitation, edited by J. J. Moree and M. M. Sier. Rotterdam: Port of Rotterdam Authorit…
